# Supplementary material for: A Pharmacist-Led Model of Medication Management Service Integrated with Critical Illness Insurance Program Review: A Prospective Evaluation in Non–Small Cell Lung Cancer
Source: Research Square preprint supplement (doi:10.21203/rs.3.rs-7605508/v1), 2025-10-23
Supplement: Supplementary file 1 [file 0103e079f8daff0ca6906ea6.docx]

Supplementary Material

**Abbreviations**

ADR, adverse drug reactions

AEs, adverse events

ALK-TKI, Anaplastic Lymphoma tyrosine kinase Inhibitor

CIIP, critical illness insurance program

DRPs, drug-related problems

EGFR-TKIs, epidermal growth factor receptor tyrosine kinase inhibitors

MMS, Medication Management Services

NSCLC, non-small cell lung cancer

QoL, quality of life

TKIs, tyrosine kinase inhibitors

**Interview Guide**

**Purpose and Scope:**

This semi-structured guide is used within the pharmacist-led MMS, in coordination with the CIIP review process, to support standardized data collection, identification of DRPs, patient education, and follow-up planning for adults with advanced NSCLC receiving EGFR-TKIs, ALK-TKIs, or multitarget TKIs. The sequence may be adapted to the clinical context, and probing questions may be added as needed.

**A. Patient Profile**

**Demographics and Contact**

- Age; sex; ethnicity; blood type; height; weight; pregnancy/lactation status; living situation; employment/occupation; health insurance (including CIIP status); email; address; telephone; housing conditions.

**Medication Experience**

- Attitudes toward medication, level of knowledge about current therapies, beliefs, perceptions, and concerns about treatment, actual medication-taking behaviors, cultural, religious, or ethical factors affecting adherence, and other special needs.

**Medical History**

- Present illness: current medications, indications, dosing regimens, and treatment outcomes.
- Past history: prior diseases and symptoms; family history; personal/social history; review of systems (see Table E1).

**Cancer Pharmacotherapy and Related History**

- Prior and current drug therapies: agents used, indications, dosing, and outcomes.
- Relevant laboratory results.
- History of adverse drug reactions.
- Use of caffeine, tobacco, alcohol, and tea; recreational substance use.
- Other products: dietary supplements, traditional Chinese medicines, and folk or alternative remedies.

**B. Adherence and Medication-Taking Behavior**

- Missed or delayed doses in the past 2–4 weeks: document frequency and reasons.
- Medication management strategies: alarms, pill organizers, caregiver assistance, etc.
- Self-adjustment of dose or schedule: ascertain motivation and outcomes.
- Barriers to adherence: adverse effects, cost/affordability or access issues, prior medication experiences, and other patient-reported obstacles.

**C. Adverse Events and Safety Monitoring**

- Since the initiation of the current TKI, have you experienced any of the following?
- Dermatologic: skin changes/paronychia, rash, pruritus, photosensitivity.
- Gastrointestinal: diarrhea, nausea, oral mucositis/ulceration.
- Respiratory: hoarseness, cough.
- Cardiovascular/Metabolic: elevated blood pressure, palpitations.
- Neurologic: headache, dizziness/vertigo, insomnia.
- Endocrine: hypothyroidism, hyperthyroidism.
- Musculoskeletal: musculoskeletal pain.
- Hematologic/Other: bleeding.
- For each symptom, record onset, duration, severity (CTCAE grade if available), precipitating factors, and any management already undertaken.
- Impact on daily life/work and willingness to continue therapy.
- Recent key test results: pertinent laboratory values and imaging findings.

**E. CIIP and Access Assessment**

- CIIP eligibility and application status; patient’s understanding of reimbursement rules and requirements.
- Out-of-pocket costs and financial burden; access barriers (eg, affordability, transportation, caregiving constraints).
- Medication supply and dispensing process: source of procurement, refills, and any logistics or delivery issues.
- Consent for payer coordination: permission for the pharmacist to communicate with CIIP/insurers to exchange necessary information for medication review and coverage coordination.

**D. Medication Education, Informedness, and Preferences**

- Education content: indications, dosing and administration, adverse effects, and key precautions.
- Preferred formats: verbal counseling, written materials, and/or digital tools.
- Caregiver involvement: determine whether a caregiver should participate or whether enhanced counseling is needed.

**Instructions for Use**

This semi-structured guide is intended for clinical interviews and care-plan development. Key interview elements should be documented in the electronic medical record/follow-up system and used for DRP classification and intervention tracking. The sequence and depth may be tailored to the patient’s circumstances; additional probes or open-ended questions may be added as appropriate.

Table E1. Review of Systems Checklist

| Patient Demographics | | | | | |
| --- | --- | --- | --- | --- | --- |
| Name： | | Sex： | | Age： | |
| Height： | | Weight： | | Waist circumference： | |
| Vital Signs | | | | | |
| Temperature： | Heart rate： | | Blood pressure： | | Respiratory rate： |
| Other (eg, pregnancy, lactation) | | | | | |
|  | | | | | |
| Laboratory examination： | | | | | |
|  | | | | | |
| Imaging examination： | | | | | |
|  | | | | | |
| Eyes, Ears, Nose, Throat, and Oral Cavity | | | | | |
| Have your eyes or vision been affected by your medications?  Are you currently being treated for glaucoma, an eye infection, an ear infection, chilblains, or dental pain?  Do you have hearing problems? Do you use a hearing aid?  Have you had a cough, a common cold, a sore throat, a sinus infection, or seasonal allergies?  Are you currently receiving dental treatment (e.g., fillings, root canal therapy)? | | | | | |
| Cardiovascular | | | | | |
| Have you ever had heart problems? Any abnormal heart rhythms (arrhythmias), chest pain, dizziness, or blood pressure issues?  Have you had your cholesterol checked? What was the cholesterol level?  Have you had vascular problems, such as atherosclerosis or vessel rupture? | | | | | |
| Respiratory | | | | | |
| Have you had any lung problems?  Do you experience shortness of breath?  Have you had pneumonia, bronchitis, influenza, chronic obstructive pulmonary disease (COPD), pulmonary embolism, or chest pain? | | | | | |
| Gastrointestinal | | | | | |
| Have you had stomach problems, such as heartburn, gastritis, or peptic ulcer disease?  Do you have stomach pain, bowel discomfort, nausea, diarrhea, or vomiting?  Have you been diagnosed with Helicobacter pylori infection?  Have you noticed signs of jaundice (yellowing of the eyes or skin)?  Have you had liver disease?  Have any liver test results been abnormal? | | | | | |
| Endocrine System | | | | | |
| Have you had thyroid problems?  Have you had your blood glucose checked?  Do you have hyperglycemia or diabetes?  Have you had pancreatic problems? | | | | | |
| Genitourinary | | | | | |
| Have you had problems with urination?  Have you had painful urination or abnormal urine color?  Have you had gynecologic fungal infections, urinary tract infections, or dysmenorrhea?  Are you taking measures to prevent osteoporosis?  Have you had a prostate examination recently?  Some people experience changes in sexual function with this medication—have you noticed any changes?  Have you had kidney problems?  Have you previously had kidney disease?  Have any kidney test results been abnormal? | | | | | |
| Hematology | | | | | |
| Do you bruise easily?  Have you had anemia? Any history of anemia?  Do you take an iron-containing multivitamin?  Do you take folic acid supplements? | | | | | |
| Musculoskeletal | | | | | |
| Have you had problems with your joints or muscles?  Do you exercise? How often?  Do you have pain, swelling, or tenderness?  Do you have arthritis or arthritis-like pain?  What medications do you use for minor pain or discomfort? | | | | | |
| Neurologic and Mental Health | | | | | |
| Have you experienced weakness, numbness, tingling, or problems with balance or walking?  Have you ever had a seizure?  Have you noticed changes in memory?  Have you had anxiety, irritability, depression, panic attacks, or difficulty concentrating?  How do you manage stress in daily life? | | | | | |
| Dermatologic | | | | | |
| Have you had skin problems?  Do you have itching, rash, acne, eczema, or ulcers?  Do you use topical medicines (e.g., creams or ointments)? | | | | | |

Table S1. Participation in CIIP Patient Review Criteria

| **Generic Name** | **Disease Indication** | **Certification Criteria** | **Medical Insurance Coverage Scope** |
| --- | --- | --- | --- |
| Icotinib Hydrochloride Tablets | NSCLC (EGFR Target) | 1. The pathological diagnosis is consistent with NSCLC. 2. Detection of sensitive EGFR gene mutation; 3. Advanced stage (IIIb-IV). | Limited to advanced NSCLC with sensitive EGFR gene mutation. |
| Erlotinib (Oral Conventional Release Dosage Form) | NSCLC (EGFR Target) | 1. The pathological diagnosis is consistent with NSCLC. 2. Detection of sensitive EGFR gene mutation; 3. Advanced stage (IIIb-IV). | Limited to advanced NSCLC with sensitive EGFR gene mutation. |
| Gefitinib Tablets | NSCLC (EGFR Target) | 1. The pathological diagnosis is consistent with NSCLC. 2. Detection of sensitive EGFR gene mutation; 3. Advanced stage (IIIb-IV). | Limited to advanced NSCLC with sensitive EGFR gene mutation. |
| Afatinib | NSCLC (EGFR-TKI) | 1. The pathological diagnosis is consistent with NSCLC; 2. Pathological examination report; 3. Detection of sensitive or mutated EGFR gene; 4. Advanced stage (IIIb-IV). | 1. Locally advanced or metastatic NSCLC with EGFR gene-sensitive mutations, previously untreated with EGFR-TKI therapy. 2. Locally advanced or metastatic squamous histology NSCLC with disease progression during or after platinum-based chemotherapy. |
|  | Lung Squamous Cell Carcinoma | 1. The pathological diagnosis is consistent with NSCLC. 2. Disease progression during or after platinum-based chemotherapy: 3. Advanced stage (IIIb-IV). | 1. Locally advanced or metastatic NSCLC with EGFR gene-sensitive mutations, previously untreated with EGFR-TKI therapy. 2. Locally advanced or metastatic squamous histology NSCLC with disease progression during or after platinum-based chemotherapy. |
| Crizotinib capsules | NSCLC (ALK Target) | 1. The pathological diagnosis is consistent with NSCLC. 2. The patient meets one of the following two criteria: (1) positive for a biomolecular marker test; or (2) positive for the ROS1 biomolecular marker. 3. Advanced stage (IIIb-IV). | For patients with locally advanced or metastatic non - small cell lung cancer positive for ALK, or patients with advanced non - small cell lung cancer positive for ROS1. |
| Anlotinib | NSCLC | 1.Pathological diagnosis conforms to non - small cell lung cancer; 2. Progression or recurrence occurred after having received at least 2 kinds of systemic chemotherapy in the past; 3. Stage IIIb - IV | For locally advanced or metastatic non - small cell lung cancer that has progressed or recurred after having received at least 2 prior lines of systemic chemotherapy. |
| Osimertinib | NSCLC | 1. The pathological diagnosis is consistent with NSCLC; 2. A history of disease progression during or after previous treatment with EGFR-TKI; 3. Positive for EGFR T790M mutation; 4. Stage IIIb-IV; 5. Age ≥ 18 years old. | Adult patients with locally advanced or metastatic NSCLC who have experienced disease progression during or after previous treatment with EGFR-TKI, and have been confirmed to have positive EGFR T790M mutation by testing. |
| Ceritinib | NSCLC | 1. The pathological diagnosis is consistent with NSCLC; 2. Disease progression after crizotinib treatment or intolerance to crizotinib; 3. Positive for biomolecular marker ALK; 4. Stage IIIB-IV. | Patients with ALK-positive locally advanced or metastatic NSCLC who have progressed after crizotinib treatment or are intolerant to crizotinib. |
| Alectinib | NSCLC | 1. The pathological diagnosis is consistent with NSCLC; 2. Biomolecular marker testing shows ALK positivity; 3. Locally advanced or metastatic disease (inoperable Stage IIIa or Stage IIIb-IV). | For patients with ALK-positive locally advanced or metastatic NSCLC. |


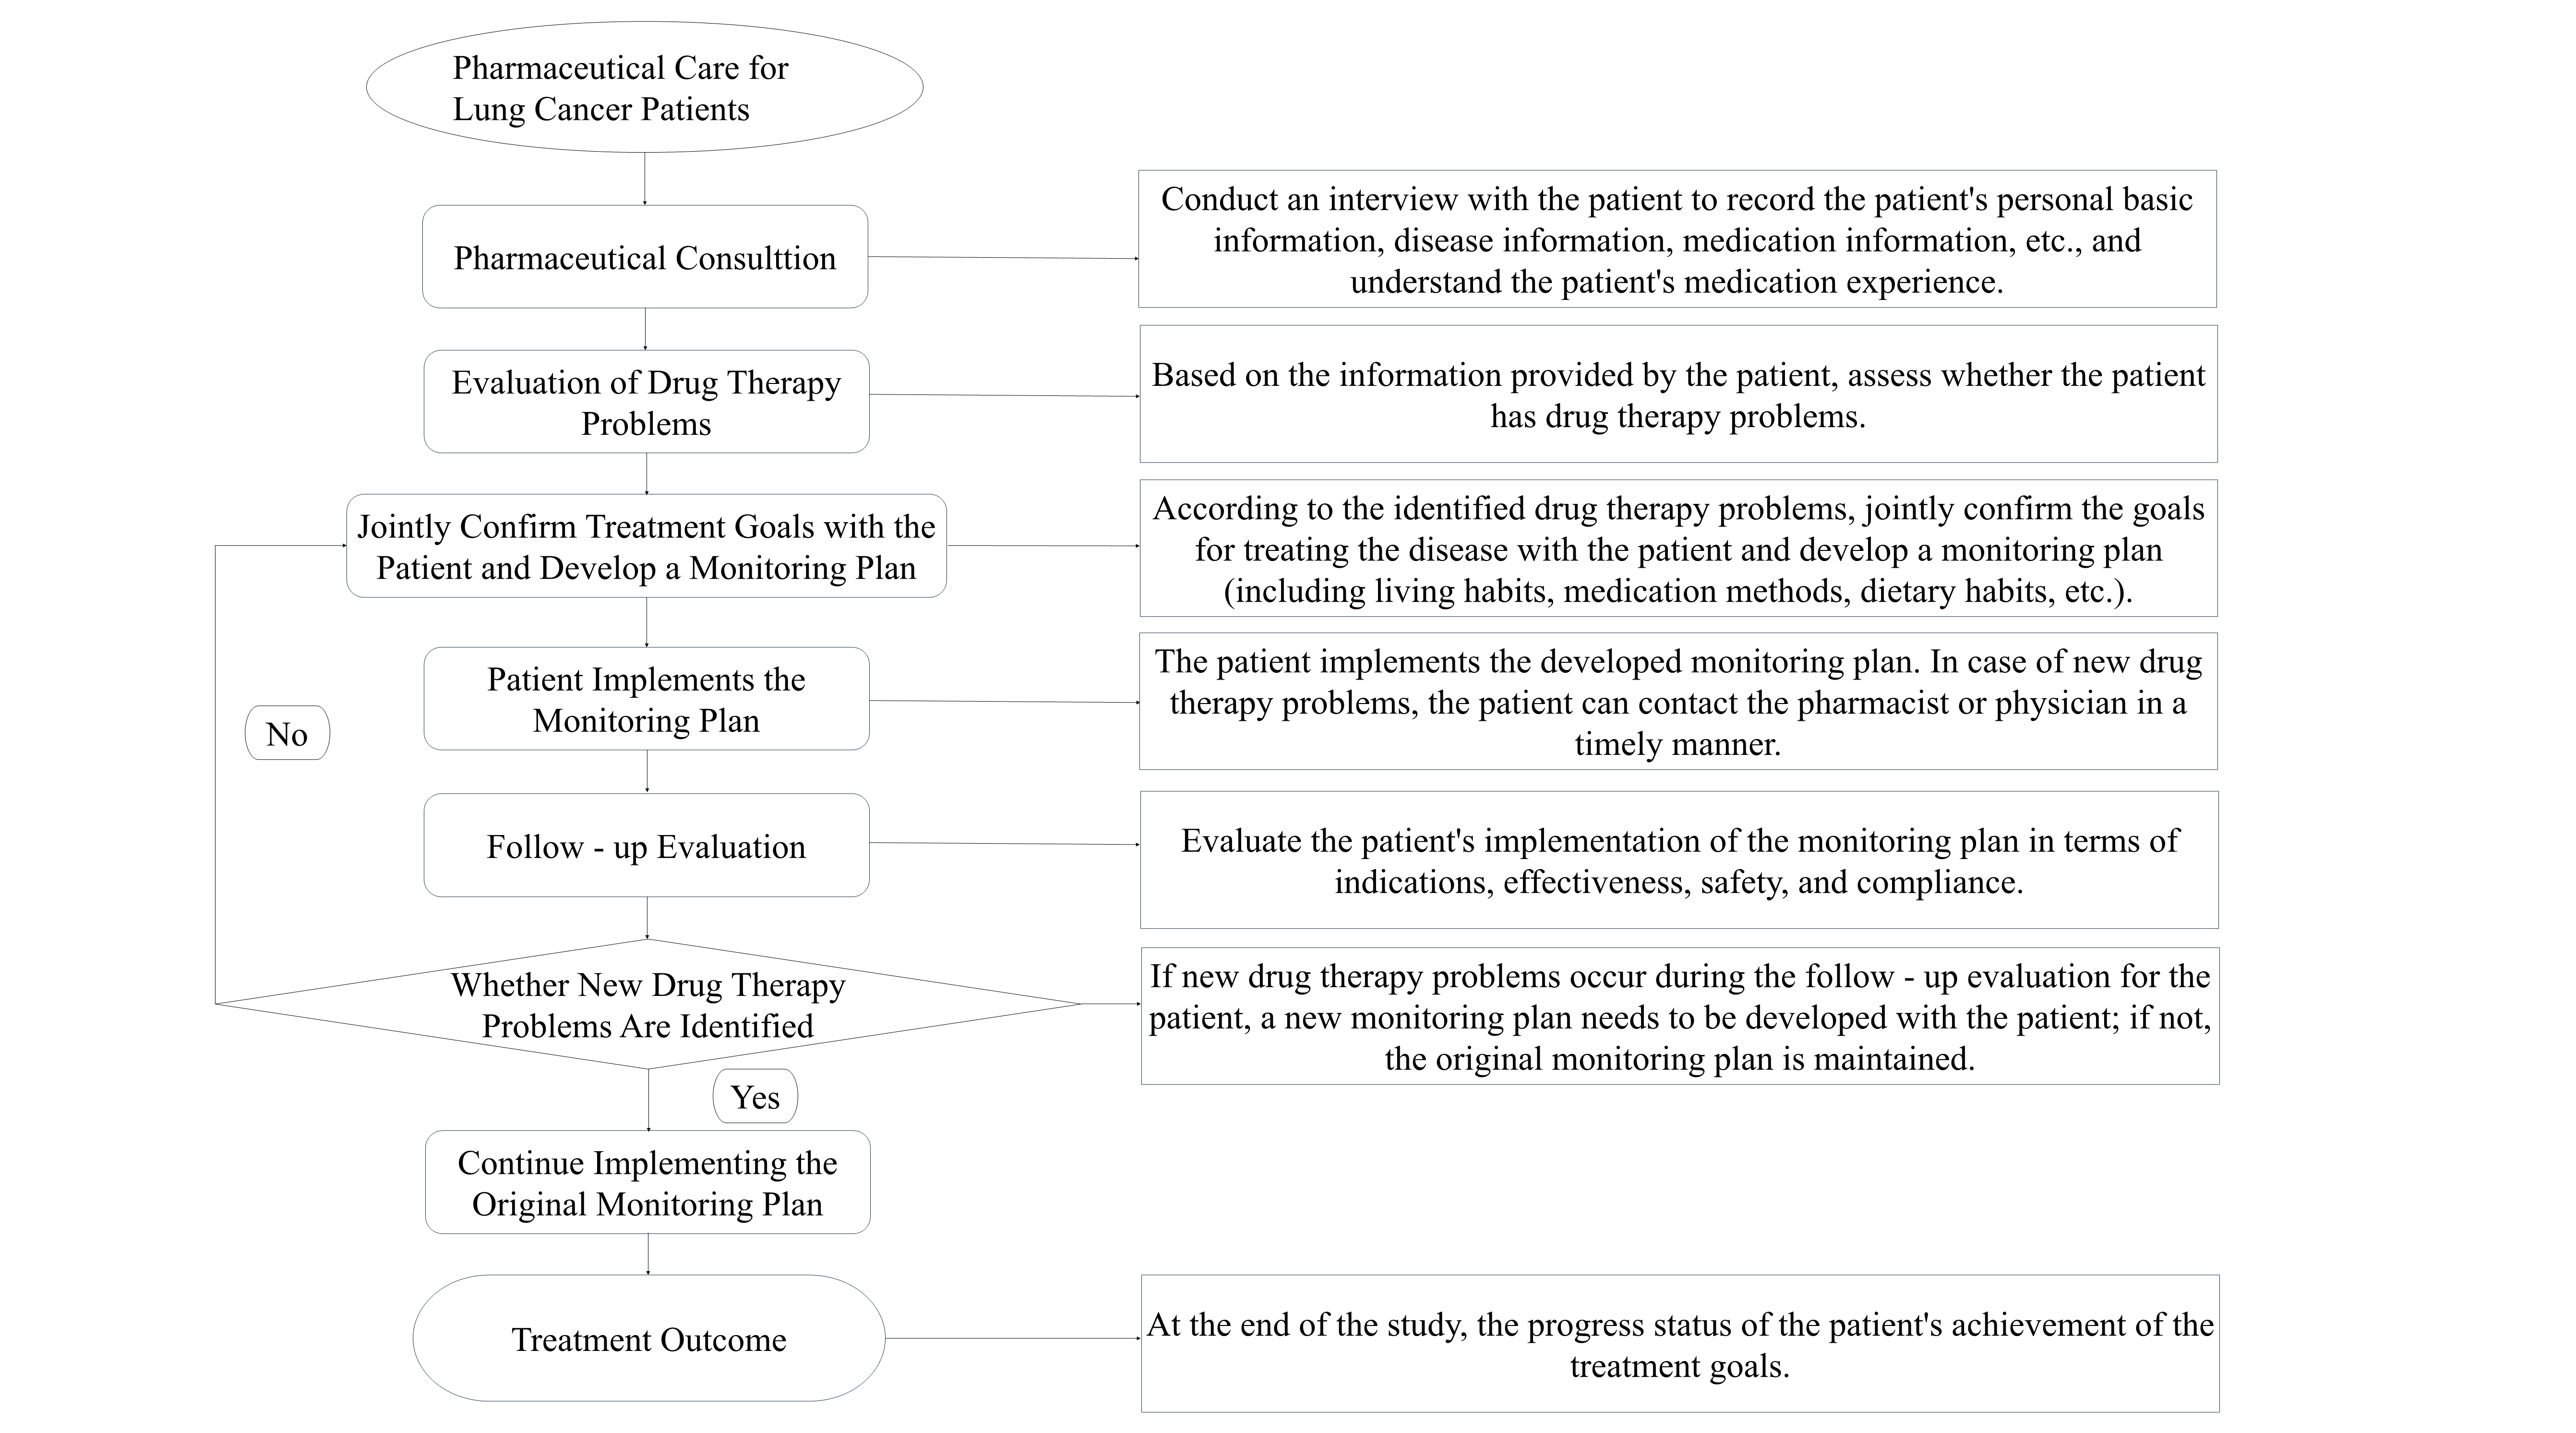


Figure S1. MMS Flow Chart

Table S2. The Situation of the Patient's Medication History after the First Pharmaceutical Consultation

| Item | Information | Number of Cases | Percentage(%) |
| --- | --- | --- | --- |
| Whether there is a history of allergies | No | 244 | 98.4 |
| Yes | 4 | 1.6 |
| Resistance to targeted drugs | No | 172 | 69.4 |
| 1 | 72 | 29 |
| 2 | 4 | 1.6 |
| Concomitant medications | 0 | 142 | 57.26 |
| 1 | 60 | 24.19 |
| 2 | 28 | 11.29 |
| 3 | 8 | 3.23 |
| ≥4 | 10 | 4.03 |

Figure S2. Top 9 Concomitant Medications

Table S3 Patient's Disease Information following the First Pharmaceutical Consultation

| Item | Information | Number of Cases | Percentage(%) |
| --- | --- | --- | --- |
| Disease Staging | Ⅲ | 24 | 9.7 |
| Ⅳ | 224 | 90.3 |
| Pathological Diagnosis | Adenocarcinoma | 177 | 71.4 |
| Squamous Cell Carcinoma | 8 | 3.2 |
| Type of Genetic Testing | Other Types of NSCLC | 61 | 24.6 |
| EGFR | 121 | 48.79 |
| ALK | 30 | 12.10 |
| EGFR-T790M | 45 | 18.15 |
| ROS 1 | 6 | 2.42 |
| Comorbid Diseases | 0 | 156 | 62.9 |
| 1 | 73 | 29.4 |
| 2 | 14 | 5.6 |
| 3 | 5 | 2 |
| Disease History | No | 237 | 95.56 |
| Yes | 11 | 4.44 |

Figure S3. Comorbid Diseases of Patients Participating in the Study

Table S4. Comorbid Diseases of Patients Participating in the Study

| Disease System | Number of Cases | Comorbid Diseases (Number of Cases) |
| --- | --- | --- |
| Circulatory System Diseases | 52 | Hypertension (n = 38), Hyperlipidemia (6), Coronary Heart Disease (n = 2), Heart Disease (n = 1), Tachycardia (n = 1), Arrhythmia (n = 1), Venous Thrombosis of Right Lower Limb (n = 1), Small Ischemic Lesion in Right Frontal Subcortex (n = 1), Cervical Artery Plaque (n = 1) |
| Endocrine, Nutritional and Metabolic Diseases | 24 | Diabetes Mellitus (n = 18), Hyperglycemia (n = 2), Gout (n = 1), Osteoporosis (n = 1), Hypokalemia (n = 1), Hypoproteinemia (n = 1) |
| Respiratory System Diseases | 9 | Chronic Obstructive Pulmonary Disease (n = 2), Emphysema (n = 2), Bronchitis (n = 2), Chronic Pharyngitis (n = 1), Cough (n = 1), Bronchial Asthma (n = 1) |
| Digestive System Diseases | 13 | Liver Function Impairment (n = 2), Chronic Cholecystitis (n = 1), Fatty Liver (n = 1), Gallbladder Stones (n = 1), Gallstones (n = 1), Ulcerative Colitis (n = 1), Gastric Discomfort (n = 1), Gastritis (n = 1), Gastric Ulcer (n = 1), Oral Ulcers (n = 3) |
| Nervous System Diseases | 9 | Epilepsy (n = 4), Cerebral Infarction (n = 2), Convulsions (n = 1), Intracranial Metastasis from Lung Cancer (n = 1),Parkinson's Disease (n = 1) |
| Infectious Diseases | 4 | Hepatitis B (n = 2), Hepatitis B Carrier (n = 1), Hepatitis B-related Cirrhosis (n = 1) |
| Hematologic and Hematopoietic System Diseases | 3 | Anemia (n = 2), Low White Blood Cell Count (n = 1) |
| Skin and Its Appendages | 3 | Psoriasis (n = 1), Neurodermatitis (n = 1), Skin Rash (n = 1) |
| Genitourinary System Diseases | 1 | Benign Prostatic Hyperplasia (n = 1) |
| Mental and Behavioral Disorders | 1 | Anxiety Disorder (n = 1) |
| Immune System Diseases | 1 | Immune Deficiency (n = 1) |
| Connective Tissue and Rheumatic Diseases | 1 | Systemic Lupus Erythematosus (n = 1) |
| Others | 18 | Pain (n = 14), Bone Pain (n = 3), Cervical Spondylosis (n = 1) |

Table S5. Distribution of Targeted Drugs Used by 248 Patients Receiving MMS

| Drug Name | | | Number of Cases | Percentage(%) |
| --- | --- | --- | --- | --- |
| EGFR-TKIs | First-Generation | Gefitinib | 82 | 33.1 |
| First-Generation | Erlotinib | 6 | 2.4 |
| First-Generation | Icotinib | 4 | 1.6 |
| Second-Generation | Afatinib | 18 | 7.3 |
| Third-Generation | Osimertinib | 55 | 22.2 |
| ALK-TKIs | First-Generation | Crizotinib | 27 | 10.9 |
| Second-Generation | Alectinib | 8 | 3.2 |
| Third-Generation | Ceritinib | 1 | 0.4 |
| Multi-Targeted TKIs | | Anlotinib | 47 | 19 |

Table S6. Intervention Measures of MMS Services After the First Consultation

| DRPs | Adjustment Recommendations | Service Content |
| --- | --- | --- |
| Adverse outcomes | Symptomatic treatment for adverse reactions in patients with reference to drug instructions | (1) If adverse reactions are mild, they can be alleviated by changing lifestyle and dietary habits. For example, for patients with oral ulcers, guide them to maintain daily oral hygiene and avoid acidic, hot, and spicy foods; for patients with skin itching, advise them to apply sunscreen and moisturizer to keep the skin moist. (2) If adverse reactions affect the quality of life, symptomatic drug treatment is required. For example, add antidiarrheal drugs such as loperamide for patients with diarrhea, and use antiallergic drugs for itching. (3) If adverse reactions are severe, suspend the use of targeted drugs until the symptoms of adverse reactions are relieved, then reduce the dose of targeted drugs and resume treatment. (4) Monitor the development of adverse reactions. |
| Excessive  dosagee (Causing Adverse Reactions) | Reduce the drug dosage | (1) For patients taking 12 mg anlotinib who have elevated blood pressure, adjust the dosage to 10mg. (2) Closely monitor the occurrence of adverse reactions. |
| Hypersensitivity  reaction | Discontinue drug use | If the patient has severe allergic reactions and poor tolerance, it is recommended to discontinue the use of this drug. |
| Unsafe medication | Discontinue the use of unsafe drugs | If the patient has bronchial asthma, it is recommended to gradually reduce the dose of metoprolol until complete discontinuation, and switch to other antihypertensive drugs. |
| Unwilling to take medication | enhance the patient's understanding of the disease, drugs, and medication regimen; strengthen psychological counseling for the patient and improve their confidence in medication adherence | (1) Educate the patient on the characteristics of the disease and the advantages and effectiveness of targeted drug therapy. (2) Provide medication education on the administration method, dosage, and precautions of targeted drugs. (3) Inform the patient of the hazards of discontinuing drugs without authorization. |
| Forgot to take medication | Enhance the patient's understanding of the disease, drugs, and medication regimen; improve the patient's awareness of the importance of pharmacotherapy | (1) Educate the patient on the characteristics of the disease and the advantages and effectiveness of targeted drug therapy. (2) Provide information on comorbidities such as hypertension. (3) Provide medication education on the administration method, dosage, and precautions of targeted drugs and other medications. (4) Inform the patient of the hazards of discontinuing drugs without authorization. (5) Advise the patient to set alarms or ask family members to remind them to take medication on time. |
| Did not understand package insert | Enhance the patient's understanding of the disease, drugs, and medication regimen | (1) Educate the patient on the characteristics of the disease and the advantages and effectiveness of targeted drug therapy. (2) Provide information on comorbidities such as hypertension. (3) Provide medication education on the administration method, dosage, and precautions of targeted drugs and other medications. (4) Inform the patient of the hazards of discontinuing drugs without authorization. |
| Need for additional drug therapy | Initiate new pharmacotherapy for untreated conditions | (1) Popularize knowledge about relevant diseases to the patient, improve their understanding of the disease, and inform them of the necessity of treatment. (2) It is recommended that patients with elevated liver transaminase levels be given liver-protecting drugs; patients with pain be given analgesics; patients with hypertension be given antihypertensive drugs; patients with chronic obstructive pulmonary disease, emphysema, or bronchial asthma be given drugs for respiratory diseases; patients with hyperglycemia or diabetes be given hypoglycemic drugs; patients with cervical artery plaques be given antithrombotic drugs; and patients with epilepsy be given antiepileptic drugs; patients with gout be given uric acid-lowering drugs; patients with leukopenia be given leukocyte-increasing drugs. |
| Need to combine with another drug to enhance efficacy | Itching Relief for Skin Itching Is Ineffective; Add Oral Antiallergic Drugs to Enhance Efficacy |
| Unnecessary drug therapy | For medication use without indication, discontinuation is recommended | (1) Two patients taking Jinsuibao Capsules and Xinnaoqing Soft Capsules have no corresponding indications; it is recommended to discontinue these medications.  (2) Inform the patients about the intended therapeutic effects of the two drugs and the risks associated with medication use without indication. |
| For patients with duplicate therapy, monotherapy is recommended | (1) Inform the patients about the therapeutic effects and mechanisms of the two concurrently used drugs: Both traditional Chinese medicines (TCMs) Xinnaokang Capsules and Compound Danshen Tablets have the effects of promoting blood circulation to remove blood stasis and regulating qi to relieve pain; the main active ingredient of Norvasc (Amlodipine Besylate Tablets) and Shihuida (Amlodipine Besylate Tablets) is amlodipine. (2) Recommend the patient to discontinue one of the duplicate drugs. |
| Patients with lifestyle risk factors | Provide medication knowledge education, inform the patients about the harms of smoking and alcohol consumption, and emphasize the necessity of smoking cessation and alcohol abstinence. |
| Subtherapeutic dosage | For patients with inappropriate dosing frequency, adjust the dosing frequency and advise adherence to the revised medical order | (1) Strengthen medication education for the patient. (2) Adjust the dosing frequency of fosinopril sodium tablets (an antihypertensive drug) from 1 tablet every 2 days to 1 tablet daily; maintain nifedipine sustained-release tablets at 1 tablet daily; adjust afatinib to 1 tablet daily. (3) For hypertensive patients, monitor blood pressure changes after dosage adjustment to determine if the effective dose is achieved. |
| For patients with subtherapeutic dosage, increase the drug dose | (1) Increase the dose of amlodipine besylate tablets (an antihypertensive drug) from the original half tablet to 1 full tablet. (2) For hypertensive patients, monitor blood pressure changes after dosage adjustment to determine if the effective dose is achieved. |
| Ineffective medication | Replace the treatment regimen with an effective alternative | For patients with long-term uncontrolled hypertension despite antihypertensive medication, it is recommended to change the antihypertensive treatment regimen. |
| Excessively dosage (Requiring Increased Monitoring) | Requiring increased monitoring | For patients taking warfarin and digoxin, clinical monitoring should be conducted to check whether the effective dosage is achieved or the dosage is excessively high |

Table S7. Modified Monitoring Plan Measures After Follow-Up Assessment

| DRPs | Adjustment Recommendations | Service Content |
| --- | --- | --- |
| Adverse outcomes | Symptomatic treatment for adverse reactions in patients with reference to drug instructions | (1) If adverse reactions are mild, they can be alleviated by changing lifestyle and dietary habits. For example, for patients with oral ulcers, guide them to maintain daily oral hygiene and avoid acidic, hot, and spicy foods; for patients with skin itching, advise them to apply sunscreen and moisturizer to keep the skin moist. (2) If adverse reactions affect the quality of life, symptomatic drug treatment is required. For example, add antidiarrheal drugs such as loperamide for patients with diarrhea, and use antiallergic drugs for itching. (3) If adverse reactions are severe, suspend the use of targeted drugs until the symptoms of adverse reactions are relieved, then reduce the dose of targeted drugs and resume treatment. (4) Monitor the development of adverse reactions. |
| Excessive dosage | Reduce the drug dosage | (1) The patient had severe adverse reactions to anlotinib, so the drug dosage was reduced; (2) the insulin dosage was too high, leading to hypoglycemia, so the insulin dosage was reduced; (3) provide medication education to the patient and inform them of the hazards of self-adjustment |
| Hypersensitivity reaction | Discontinue drug use | The patient had severe allergic reactions to erlotinib, so it is recommended to discontinue the drug and switch to alternative treatment. |
| Unsafe medication | Select more effective drugs | The patient's blood pressure control was not ideal with antihypertensive drugs, so it is recommended to change the treatment plan; the patient had adverse reactions such as acid regurgitation and heartburn when using omeprazole, so it is recommended to adjust to hydrotalcite for treatment; the treatment for gastric discomfort was ineffective, so it is recommended to switch. |
| The disease is drug-resistant, so it is recommended to change the treatment plan | In this study, after taking targeted agents such as gefitinib for a period of time, disease progression and drug resistance may occur. it is recommended to change the treatment plan, select more effective drugs or other methods such as chemotherapy; at the same time, it is necessary to strengthen psychological counseling for patients and improve their confidence in overcoming the disease. |
| Subtherapeutic dosage | Increase the drug dosage for patients with subtherapeutic dosage | The patient's blood glucose control was not ideal with metformin (a hypoglycemic drug), so it is recommended to increase the dosage to four tablets. |
| Patient cannot afford the cost | Strengthen the patient's understanding of the disease, drugs and medication regimen; strengthen psychological counseling for the patient; | The characteristics of the disease and the advantages and effectiveness of targeted drug therapy; inform the patient of the hazards of discontinuing drugs； |
| Unwilling to take medication | Strengthen the patient's understanding of the disease, drugs and medication regimen; improve the patient's attention to pharmacotherapy; | One patient had hyperlipidemia but took lipid-lowering drugs irregularly due to fear of side effects; one patient discontinued hypoglycemic drugs without authorization; inform the patients of the hazards of self-discontinuation of drugs; |
| Did not understand package insert | Strengthen the patient's understanding of the disease, drugs and medication regimen； | One patient took omeprazole at night, which was incorrect—omeprazole should be taken 30 minutes to 1 hour before meals; one patient had adverse reactions due to self-adjustment of drug dosage; inform the patients of the adverse reactions of self-discontinuation of drugs. |
| Need for additional ·drug therapy< | There are untreated conditions that require additional symptomatic drug treatment | The patient has hypertension and needs additional antihypertensive drug treatment. |
| Unnecessary drug therapy | It is recommended to use monotherapy for patients with duplicate treatment | The patient's blood glucose control is stable while taking both metformin and glimepiride, so one hypoglycemic drug can be discontinued; the patient's liver function has returned to normal, so one liver-protecting drug can be discontinued |


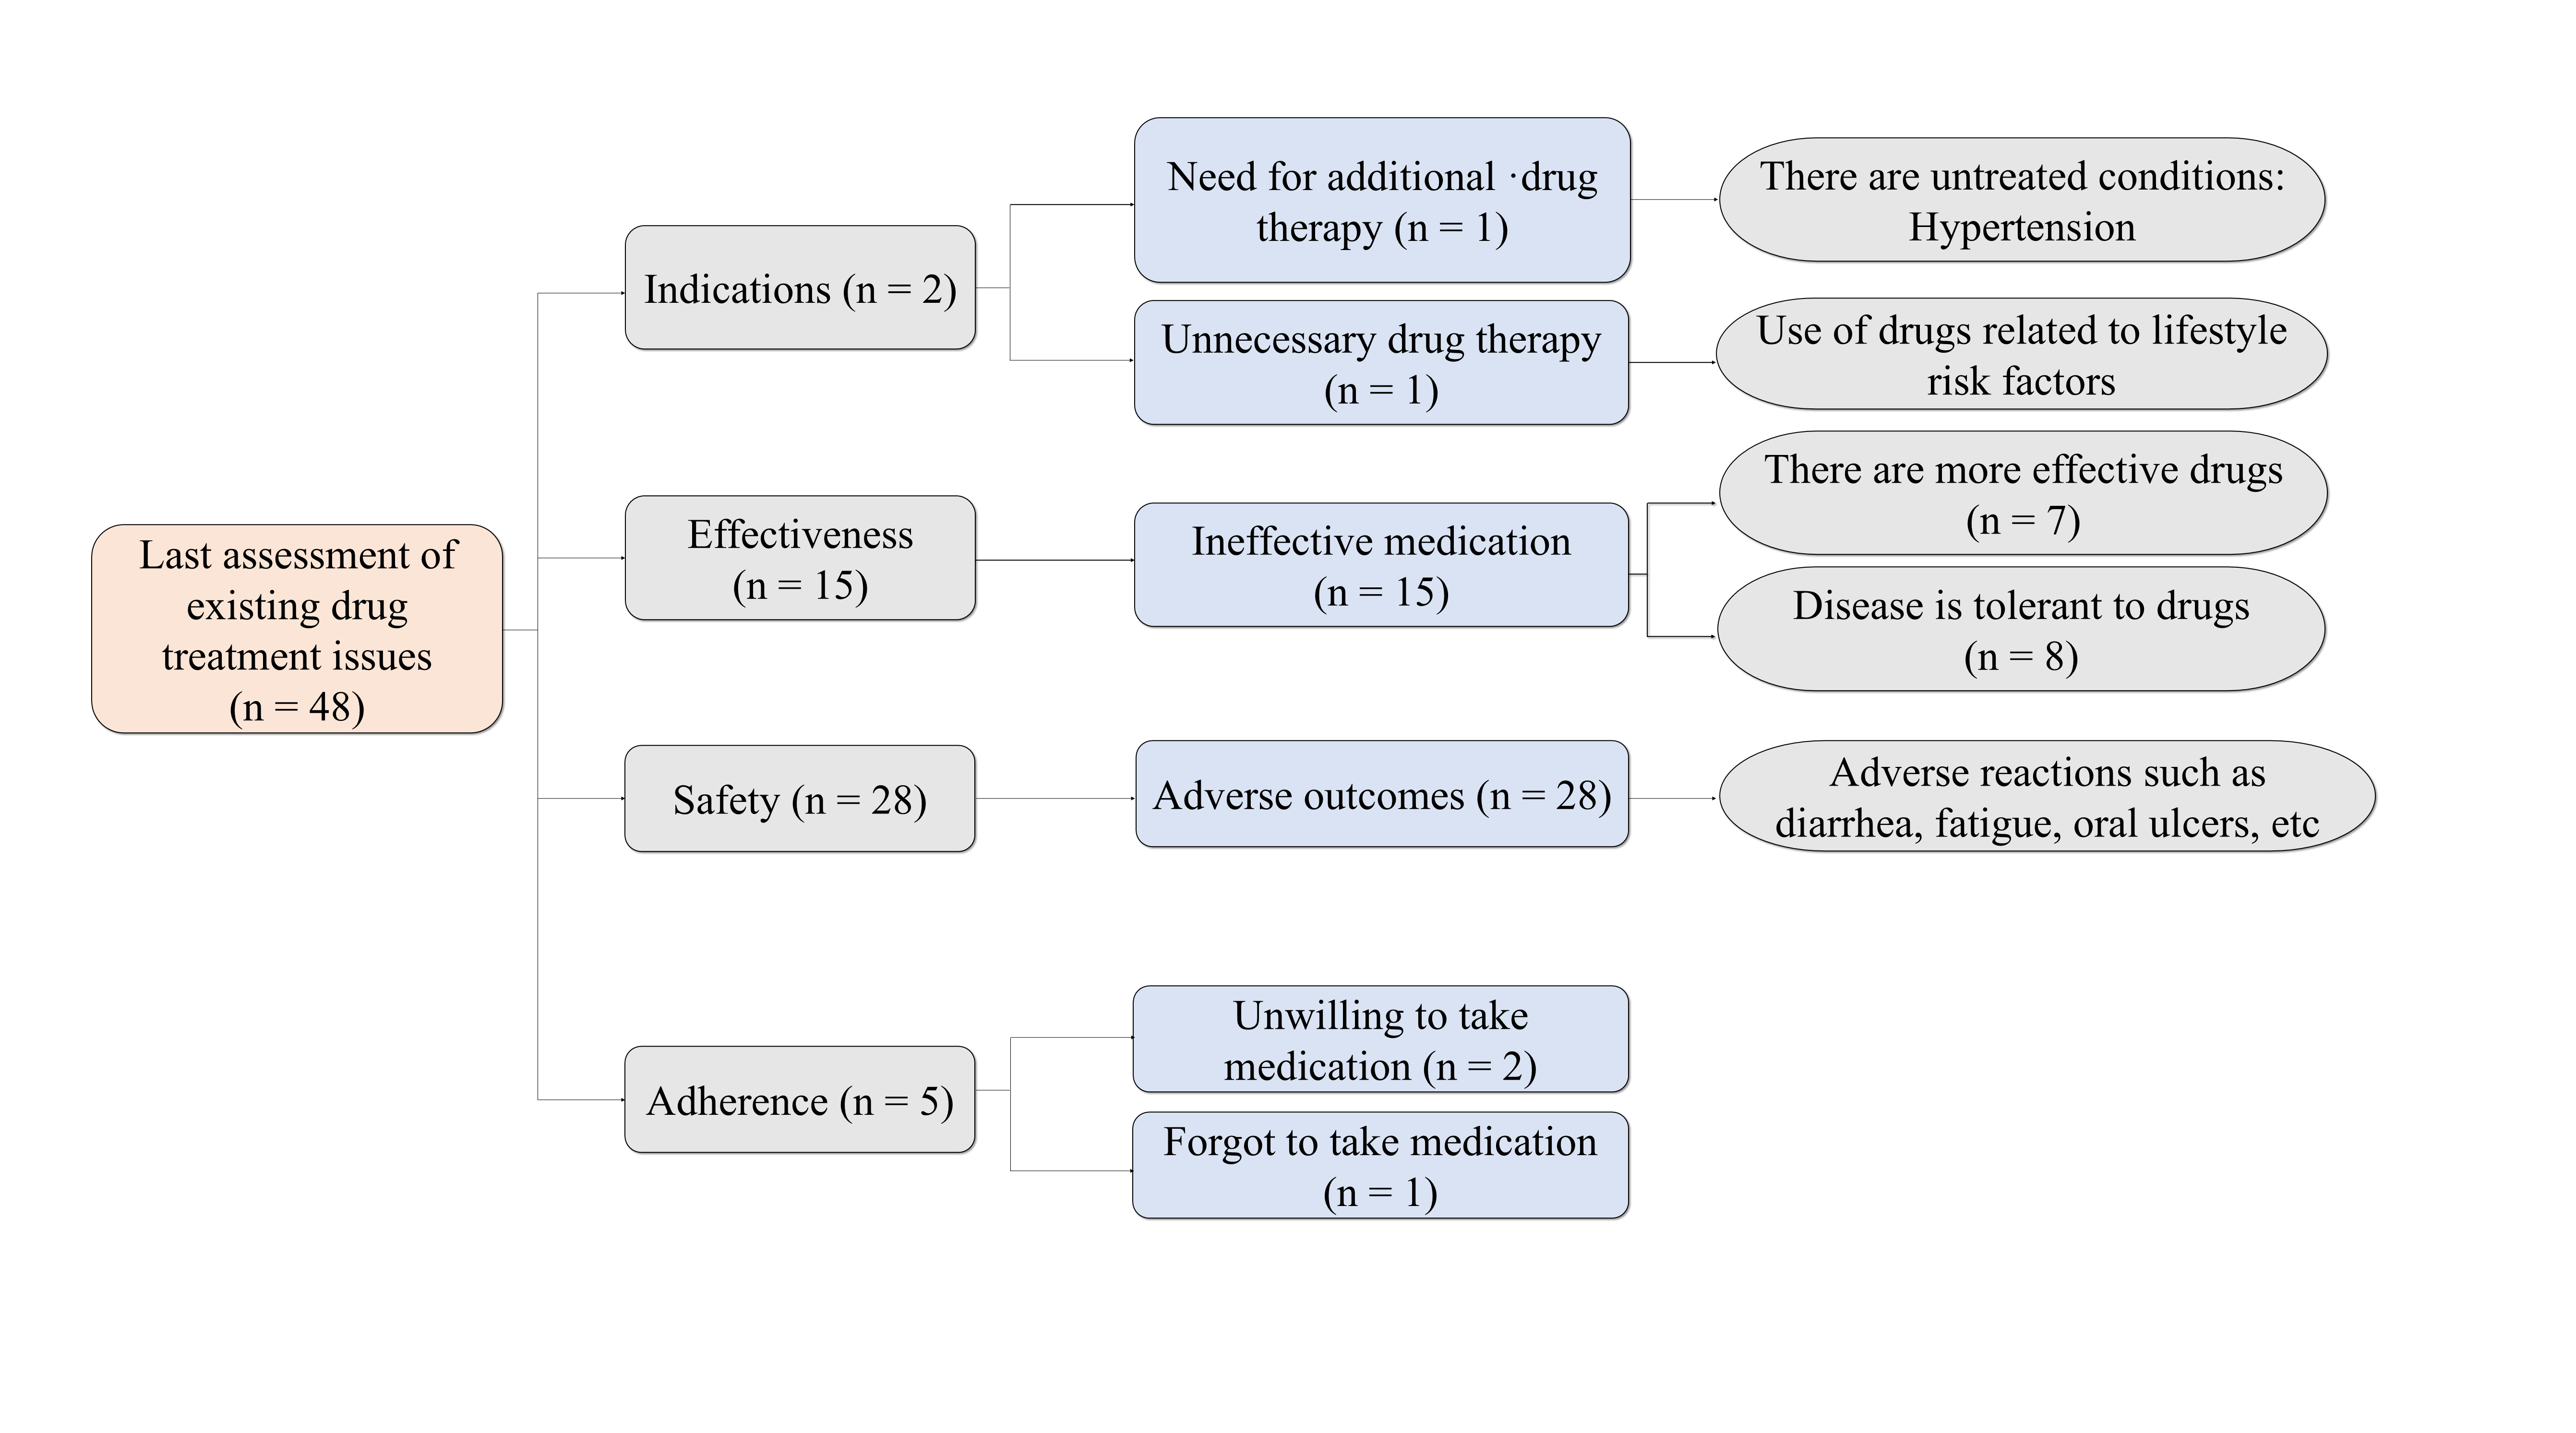


Figure S4. Analysis of Drug Treatment Problems Still Existing in Patients at the End of Follow-up

Table S8. Classification of Drug Treatment Problems Still Existing in Patients at the End of Follow-up

| Category | Item | Number | Percentage |
| --- | --- | --- | --- |
| Safety | Adverse outcomes | 28 | 14.74% |
| Effectiveness | Ineffective medication | 15 | 7.89% |
| Adherence | Unwilling to take medication | 2 | 1.05% |
| Effectiveness | Forgot to take medication | 1 | 0.53% |
| Indications | Unnecessary drug therapy | 1 | 0.53% |
| Need for additional ·drug therapy | 1 | 0.53% |

Table S9. Comparison of the Reduction in Patients' Drug Treatment Problems

| Name of drug treatment problem type | | First time (number/percentage) | Last time (number/percentage) |
| --- | --- | --- | --- |
| Category | Item | Number of problems | Number of problems |
| Safety | Adverse outcomes | 140（45.90%） | 28（14.74%） |
| Excessive dosage | 10（3.28%） | No |
| Hypersensitivity reaction | 1（0.33%） | No |
| Unsafe medication | 1（0.33%） | No |
| Adherence | Unwilling to take medication | 55（18.03%） | 2（1.05%） |
| Forgot to take medication | 31（10.16%） | 1（0.53%） |
| Did not understand package insert | 18（5.90%） | No |
| Indications | Need for additional ·drug therapy | 27（8.85%） | 1（0.53%） |
| Unnecessary drug therapy | 16（5.25%） | 1（0.53%） |
| Effectiveness | Subtherapeutic dosage | 3（1.31%） | No |
| Ineffective medication | 1（0.33%） | 15（7.89%） |
| Excessive·dosage | 1（0.33%） | No |

Table S10. Outcomes of Patients Participating in the Study

| Patient outcomes | Number of cases | Percentage |
| --- | --- | --- |
| Death | 26 | 10.48% |
| Drug discontinuation | 32 | 12.90% |
| Disease progression | 16 | 6.45% |
| Stable | 168 | 67.74% |
| Partial remission | 6 | 2.42% |

Table S11. Medication Information of Deceased Patients

| Category | Number of cases | Percentage(%) |
| --- | --- | --- |
| Gefitinib | 6 | 23.1 |
| Osimertinib | 4 | 15.4 |
| Anlotinib | 12 | 46.2 |
| Crizotinib | 2 | 7.7 |
| Afatinib | 1 | 3.8 |
| Erlotinib | 1 | 3.8 |

Table S12. Information and reasons of patients who discontinued medication

| Item category | | Number of cases | Percentage(%) |
| --- | --- | --- | --- |
| Sex | Female | 17 | 53.1 |
| Male | 15 | 46.9 |
| Drugs used before discontinuation | Erlotinib | 1 | 3.1 |
| Gefitinib | 4 | 12.5 |
| Osimertinib | 11 | 34.4 |
| Anlotinib | 9 | 28.1 |
| Crizotinib | 2 | 6.3 |
| Afatinib | 4 | 9.4 |
| Icotinib | 1 | 3.1 |
| Alectinib | 1 | 3.1 |
| Reasons for discontinuation | Severe adverse reactions | 5 | 15.6 |
| Discontinuation of medication is allowed after lung cancer surgery | 1 | 3.1 |
| Disease progression | 21 | 65.6 |
| Economic reasons | 5 | 15.6 |

Table S13. Adverse reaction status of gefitinib

| Involved systems - organs | Frequency | | Name of adverse reaction (case count) |
| --- | --- | --- | --- |
| Skin and subcutaneous tissue disorders | 92 | Dry Skin (n = 8), Acne (n = 1), Pruritus (n = 1), Rash (n = 33), Dark Face* (n = 2), Skin Desquamation (n = 4), Erythema (n = 1), Facial Flushing* (n = 1), Hirsutism* (n = 1), Eczema (n = 1), Skin Chapping (n = 1), Ichthyosiform Skin (n = 1), Tender Skin* (n = 1), Increased Dandruff (n = 1), Tender Nails (n = 1), Onychomycosis (n = 2), Paronychia (n = 3), Ingrown Nail (n = 2), Dry And Cracked Nails (n = 2), Red And Swollen Nails (n = 1), Nail Pain (n = 1), Nail Loss (n = 1) | |
| Gastrointestinal system disorders | 37 | Constipation* (n = 3), Abdominal Pain* (n = 1), Diarrhea (n = 17), Oral Ulcer (n = 12), Abdominal Distension* (n = 1), Oral Inflammation (n = 1), Oral Pain (n = 1) | |
| Respiratory, thoracic and mediastinal disorders | 11 | Nasal Inflammation* (n = 1), Dry Nasal Cavity* (n = 5), Hoarseness* (n = 1), Epistaxis (n = 2), Chest Tightness (n = 1), Pleural Effusion* (n = 1) | |
| Ocular organ disorders | 3 | Blurred Vision (n = 1), Eyelid Edema (n = 1) | |
| Hepatobiliary system disorders | 5 | Liver Function Impairment (n = 3), Increased Transaminase (n = 2) | |
| Infections and infectious diseases | 3 | Toenail Abscess (n = 1), Ocular Discharge* (n = 1), Herpes Labialis* (n = 1) | |
| General disorders and administration site reactions | 9 | Somatic Edema* (n = 1), Limb Edema* (n = 2), Edema* (n = 1), Pain* (n = 1), Wrist Pain* (n = 1), Leg Pain* (n = 2), Bone Pain* (n = 1) | |
| Metabolic and nutritional disorders | 1 | Decreased Appetite (n = 1) | |
| Various nervous system disorders | 6 | Headache* (n = 2), Dizziness* (n = 1), Palpitation* (n = 1), Tongue Numbness* (n = 1), Leg Numbness* (n = 1) | |

Note: * indicates adverse reactions not mentioned in the package insert.

Table S14. Adverse Reaction Status of Afatinib

| Involved systems-organs | Frequency | Name of adverse reaction (case count) |
| --- | --- | --- |
| Skin and subcutaneous tissue disorders | 12 | Rash (n = 5), Skin Desquamation (n = 1), Paronychia (n = 2), Skin Chapping (n = 1), Generalized Pruritus (n = 1), Photosensitivity Reaction* (n = 1) |
| Gastrointestinal system disorders | 8 | Diarrhea (n = 5), Oral Ulcer (n = 3) |
| Various nervous system disorders | 4 | Foot Pain* (n = 2), Foot Numbness* (n = 1), Pain* (n = 1) |
| Metabolic and nutritional disorders | 1 | Decreased Appetite (n = 1) |

Note: * indicates adverse reactions not mentioned in the package insert.

Table S15. Adverse reaction status of osimertinib

| Involved systems-organs | Frequency | Name of adverse reaction (case count) |
| --- | --- | --- |
| Skin and subcutaneous tissue disorders | 63 | Rash (n = 17), Dry Skin (n = 9), Pruritus (n = 10), Skin Exfoliation (n = 2), Paronychia (n = 8), Brittle Nails (n = 4), Nail Softening (n = 3), Nail Splitting (n = 3), Digital Chapping (n = 1), Nail Loss (n = 1), Nail Granuloma (n = 1), Pustules (n = 2), Hyperhidrosis* (n = 1) |
| Gastrointestinal system disorders | 40 | Diarrhea (n = 15), Oral Ulcer (n = 12), Oral Pain (n = 1), Nausea (n = 1), Vomiting (n = 1), Constipation (n = 2), Red Tongue (n = 1), Stomach Pain (n = 1), Masticatory Weakness (n = 1), Dry Lips* (n = 1) |
| Respiratory, thoracic and mediastinal disorders | 3 | Hoarseness* (n = 1), Nasal Inflammation* (n = 1), Dry Nasal Cavity* (n = 1) |
| Metabolic and nutritional disorders | 8 | Decreased Appetite (n = 8) |
| Various nervous system disorders | 5 | Headache (n = 2), Dizziness (n = 2), Taste Disorder* (n = 1) |
| Ocular organ disorders | 5 | Keratitis (n = 1), Dry Eyes (n = 1), Decreased Visual Acuity* (n = 1), Eyelid Edema (n = 1), Blurred Vision (n = 1), Red and Swollen Eyes (n = 1) |
| General disorders and administration site reactions | 4 | Foot Edema* (n = 1), Facial Edema* (n = 1), Pain* (n = 1), Back Pain* (n = 1) |
| Hepatobiliary system disorders | 1 | Liver Function Impairment |
| Various examinations | 3 | Decreased White Blood Cell Count (n = 2), Decreased Platelet Count (n = 1) |

Note: * indicates adverse reactions not mentioned in the package insert.

Table S16. Adverse Reaction Status of Crizotinib

| Involved systems-organs | Frequency | Name of adverse reaction (case count) |
| --- | --- | --- |
| Gastrointestinal system disorders | 33 | Diarrhea (n = 12), Vomiting (n = 7), Nausea (n = 5), Abdominal Distension (n = 3), Constipation (n = 2), Belching* (n = 1), Acid Reflux* (n = 1), Heartburn* (n = 1), Abnormal Stool* (n = 1) |
| General disorders and administration site reactions | 11 | Edema (n = 6), Fatigue (n = 4), Back Pain* (n = 1) |
| Skin and subcutaneous tissue disorders | 4 | Rash (n = 2), Facial Flushing* (n = 1), Pruritus* (n = 1) |
| Hepatobiliary system disorders | 5 | Increased Transaminase (n = 5) |
| Various nervous system disorders | 5 | Somnolence* (n = 2), Dizziness (n = 1), Tongue Numbness* (n = 1), Taste Disorder (n = 1) |
| Cardiac organ disorders | 2 | Slow Heart Rate (n = 1), Bradycardia (n = 1) |
| Respiratory, thoracic and mediastinal disorders | 1 | Hoarseness* (n = 1) |
| Ocular organ disorders | 1 | Blurred Vision (n = 1) |

Note: * indicates adverse reactions not mentioned in the package insert.

Table S17. Adverse Reaction Status of Alectinib

| Involved systems-organs | Frequency | Name of adverse reaction (case count) |
| --- | --- | --- |
| Skin and subcutaneous tissue disorders | 4 | Rash Under Sunlight (n = 1), Rash (n = 1), Allergy (n = 1), Darkened Face* (n = 1) |
| General disorders and administration site reactions | 2 | Lower Extremity Edema |
| Gastrointestinal system disorders | 2 | Constipation |
| Vascular and lymphatic system disorders | 1 | Hypertension* |
| Musculoskeletal system disorders | 1 | Muscle Soreness |

Note: * indicates adverse reactions not mentioned in the package insert.

Table S18. Adverse Reaction Status of Anlotinib

| Involved systems-organs | Frequency | Name of adverse reaction (case count) |
| --- | --- | --- |
| Gastrointestinal system disorders | 20 | Diarrhea (n = 8), Vomiting (n = 3), Nausea (n = 1), Constipation* (n = 3), Oral Pain (n = 1), Oral Bleeding (n = 1), Abdominal Distension* (n = 1), Gingival Bleeding (n = 1), Gingivitis* (n = 1), Dysphagia* (n = 1) |
| Respiratory, thoracic and mediastinal disorders | 17 | Hoarseness (n = 8), Epistaxis (n = 3), Chest Tightness (n = 2), Rhinorrhea (n = 1), Throat Discomfort (n = 1), Nasal Itching* (n = 1) |
| Skin and subcutaneous tissue disorders | 9 | Skin Desquamation (n = 3), Hand-Foot Syndrome (n = 1), Red Spots on Fingertips* (n = 1), Skin Itching (n = 1), Pruritus (n = 1), Skin Chapping (n = 1), Brittle Nails* (n = 1) |
| Vascular and lymphatic system disorders | 7 | Hypertension (n = 4), Increased Blood Pressure (n = 3) |
| Various nervous system disorders | 7 | Dizziness (n = 4), Postural Dizziness (n = 1), Taste Disorder* (n = 1), Numbness of Left Upper and Lower Limbs* (n = 1) |
| General disorders and administration site reactions | 10 | Fatigue (n = 5), Generalized Pain (n = 1), Pain in Hands and Feet (n = 1), Hand Pain (n = 1), Generalized Edema (n = 1), Foot Pain (n = 1) |
| Metabolic and nutritional disorders | 7 | Decreased Appetite (n = 5), Anorexia (n = 1), Hunger Sensation (n = 1) |
| Ocular organ disorders | 1 | Red and Swollen Eyelids* |
| Various musculoskeletal and connective tissue disorders | 1 | Leg Soreness |

Note: * indicates adverse reactions not mentioned in the package insert.

Table S19. Status of NSCLC patients in the MMS Clinic who failed to be enrolled in the CIIP

| Classification of failure reasons | Drug name | Specific review issues | Result (case count) |
| --- | --- | --- | --- |
| Patient's disease stage does not meet the certification requirements | Gefitinib | The patient has NSCLC; chest CT shows a 1.6 cm nodule, and the pathological report indicates invasion of the visceral pleura with no lymph node or other metastases. The disease stage does not meet the social security requirements. | Not Approved (2) |
| Gefitinib | The patient's report shows T3N2M0, which does not meet the standard for stage IIIb. | Not Approved (1) |
| Gefitinib | The patient's disease stage is T2aN0M0 (Stage Ib). | Not Approved (1) |
| Gefitinib | The patient's disease stage is T1N1MX. | Not Approved (1) |
| Patient's genetic test does not meet the certification requirements | Gefitinib | Right lung non-small cell lung adenocarcinoma: After 6 cycles of use, the efficacy was poor. Circulating DNA testing showed the exon was wild-type, and it was recommended to discontinue Iressa (Gefitinib). | Not Approved (1) |
| Osimertinib | Lung adenocarcinoma; genetic test result was unqualified, and the drug was switched to Gefitinib. | Not Approved (1) |
| Patient's disease treatment process does not meet the certification requirements | Anlotinib | Non-small cell lung adenocarcinoma; the patient received PD-1 therapy but no chemotherapy, which does not meet the approval criteria for Anlotinib. | Not Approved (1) |
| Gefitinib | The patient with NSCLC had disease progression, new lesions, bone metastases, and enlarged lesions. | Not Approved (1) |
| Osimertinib | No previous use of other drugs. | Not Approved (1) |
| Anlotinib | The patient had only used Gefitinib previously and had not received two lines of systemic chemotherapy. | Not Approved (2) |
| Anlotinib | The patient used Crizotinib and Ceritinib; the application for Anlotinib does not meet the certification standards. | Not Approved (1) |
| Patient's medication usage and dosage do not meet the certification requirements | Erlotinib | The patient has lung cancer and concurrent tuberculosis, and is using Rifampicin, which will affect the efficacy of Erlotinib. It is recommended to increase the dose by 50 mg every 2 weeks. The medical insurance stipulates that the maximum reimbursable dose is 150 mg, and the patient is advised to purchase the additional dose at their own expense. | Approved (1) [Note: The additional dose is self-funded] |
| Icotinib | The patient's treatment cycle was written as 30 days; the doctor was requested to revise it to 28 days. | Approved After Revision (1) |
| Icotinib | The medication usage and dosage on the prescription did not match the treatment plan. | Approved After Revision (1) |
| Patient's provided information is incomplete | Crizotinib | The patient had no CT report in the past year. | Not Approved (1) |
| Afatinib | No data on disease progression after chemotherapy was provided. | Not Approved (1) |
| Icotinib | No treatment evaluation/application form was provided after 6-8 weeks of treatment; the doctor was requested to fill in the application form. | Pending (1) [Note: Doctor to fill in the application form] |
| Errors in the application form/prescription | Icotinib | The generic name of Conmana (Icotinib) was written as Gefitinib; the doctor was requested to revise it to Icotinib. | Pending (1) [Note: Doctor to revise to Icotinib] |
| Icotinib | The dose should be 10 ml, but the doctor wrote 10 mg; it is recommended to ask the doctor to correct it. | Pending (1) [Note: Doctor to correct the dose] |
| Icotinib | The prescribed dose was too high. | Approved After Revision (1) |
